# Supplementary material for: The Emotional Experience of Flowers: Zoomed In, Zoomed Out and Painted
Source: MDPI journal article supplement (doi:10.3390/horticulturae8070668), 2022-07-21
Supplement: s1 [file s1]

## SUPPLEMENTARY DATA

**Table S1.** Parameters of the GLMM for the dependent variable Liking in the comparison between images of flowers and nature.

|                                    | $\beta$ | SE    | t      | <i>p</i>         | 95% CI           |
|------------------------------------|---------|-------|--------|------------------|------------------|
| Nature vs. flowers                 | -0.282  | 0.043 | -6.541 | <b>&lt;0.001</b> | [-0.366; -0.197] |
| Gender                             | 0.173   | 0.112 | 1.544  | 0.123            | [-0.047; 0.394]  |
| Familiarity                        | 0.267   | 0.012 | 22.218 | <b>&lt;0.001</b> | [0.244; 0.291]   |
| Age                                | 0.001   | 0.003 | 0.291  | 0.771            | [-0.005; 0.006]  |
| Geographical Region 1 <sup>1</sup> | 0.403   | 0.127 | 3.173  | <b>0.002</b>     | [0.154; 0.652]   |
| Geographical Region 2 <sup>1</sup> | 0.373   | 0.137 | 2.728  | <b>0.006</b>     | [0.105; 0.641]   |
| Geographical Region 3 <sup>1</sup> | 0.571   | 0.146 | 3.901  | <b>&lt;0.001</b> | [0.284; 0.858]   |

<sup>1</sup> Geographical Region 1 = Europe; 2 = North America, 3 Israel, 4 = Japan, Geographical regions 1, 2 and 3 are compared with region 4.

**Table S2.** Parameter of the GLMM for the dependent variable emotional valence in the comparison between images of flowers and nature.

|                       | $\beta$ | SE    | t      | <i>p</i>         | 95% CI           |
|-----------------------|---------|-------|--------|------------------|------------------|
| Nature vs. flowers    | -0.283  | 0.041 | -6.874 | <b>&lt;0.001</b> | [-0.393; -0.202] |
| Gender                | 0.163   | 0.119 | 1.370  | 0.171            | [-0.070; 0.396]  |
| Familiarity           | 0.248   | 0.012 | 21.424 | <b>&lt;0.001</b> | [0.225; 0.271]   |
| Age                   | 0.001   | 0.003 | 0.411  | 0.681            | [-0.005; 0.007]  |
| Geographical Region 1 | 0.381   | 0.135 | 2.834  | <b>0.005</b>     | [0.117; 0.645]   |
| Geographical Region 2 | 0.331   | 0.145 | 2.286  | <b>0.022</b>     | [0.047; 0.615]   |
| Geographical Region 3 | 0.566   | 0.155 | 3.652  | <b>&lt;0.001</b> | [0.262; 0.870]   |

**Table S3.** Parameter of the GLMM for the dependent variable emotional arousal–excitement in the comparison between images of flowers and nature.

|                       | $\beta$ | SE    | t      | <i>p</i>         | 95% CI           |
|-----------------------|---------|-------|--------|------------------|------------------|
| Nature vs flowers     | 0.412   | 0.055 | 7.435  | <b>&lt;0.001</b> | [0.303; 0.520]   |
| Gender                | -0.143  | 0.143 | -0.995 | 0.320            | [-0.423; 0.138]  |
| Familiarity           | -0.135  | 0.015 | -8.772 | <b>&lt;0.001</b> | [-0.166; -0.105] |
| Age                   | 0.000   | 0.004 | 0.056  | 0.955            | [-0.007; 0.007]  |
| Geographical Region 1 | 0.513   | 0.162 | 3.164  | <b>0.002</b>     | [0.195; 0.831]   |
| Geographical Region 2 | 0.625   | 0.174 | 3.583  | <b>&lt;0.001</b> | [0.283; 0.966]   |
| Geographical Region 3 | 0.589   | 0.187 | 3.205  | <b>0.001</b>     | [0.232; 0.964]   |

**Table S4.** Parameter of the GLMM for the dependent variable emotional arousal–awake in the comparison between images of flowers and nature.

|                       | $\beta$ | SE    | t      | <i>p</i>         | 95% CI           |
|-----------------------|---------|-------|--------|------------------|------------------|
| Nature vs. flowers    | −0.137  | 0.039 | −3.544 | <b>&lt;0.001</b> | [−0.213; −0.061] |
| Gender                | 0.078   | 0.116 | 0.671  | 0.502            | [−0.150; 0.305]  |
| Familiarity           | 0.090   | 0.011 | 8.215  | <b>&lt;0.001</b> | [0.068; 0.111]   |
| Age                   | 0.008   | 0.003 | 2.771  | 0.006            | [0.002; 0.014]   |
| Geographical Region 1 | 0.459   | 0.131 | 3.496  | <b>&lt;0.001</b> | [0.201; 0.716]   |
| Geographical Region 2 | 0.012   | 0.141 | 0.084  | 0.933            | [−0.265; 0.289]  |
| Geographical Region 3 | 0.424   | 0.151 | 2.805  | 0.005            | [0.128; 0.720]   |

**Table S5.** Parameters of the GLMM for the dependent variable Liking in the comparison between images of cultivated flowers and drawings representing flowers.

|                                            | $\beta$ | SE    | t      | <i>p</i>         | 95% CI          |
|--------------------------------------------|---------|-------|--------|------------------|-----------------|
| Cultivated flowers and drawings of flowers | 0.918   | 0.071 | 12.837 | <b>&lt;0.001</b> | [0.777; 1.058]  |
| Gender                                     | 0.206   | 0.145 | 1.421  | 0.156            | [−0.078; 0.490] |
| Familiarity                                | 0.243   | 0.018 | 13.749 | <b>&lt;0.001</b> | [0.208; 0.278]  |
| Age                                        | 0.000   | 0.004 | 0.136  | 0.892            | [−0.007; 0.008] |
| Geographical Region 1                      | −0.004  | 0.164 | −0.026 | 0.979            | [−0.326; 0.318] |
| Geographical Region 2                      | 0.113   | 0.176 | 0.639  | 0.523            | [−0.233; 0.459] |
| Geographical Region 3                      | 0.370   | 0.189 | 1.958  | 0.05             | [−0.001; 0.740] |

**Table S6.** Parameter of the GLMM for the dependent variable emotional valence (pleasant) in the comparison between images of cultivated flowers and drawings representing flowers.

|                                            | $\beta$ | SE    | t      | <i>p</i>         | 95% CI          |
|--------------------------------------------|---------|-------|--------|------------------|-----------------|
| Cultivated flowers and drawings of flowers | 0.754   | 0.065 | 11.527 | <b>&lt;0.001</b> | [0.626; 0.883]  |
| Gender                                     | 0.184   | 0.142 | 1.292  | 0.197            | [−0.095; 0.464] |
| Familiarity                                | 0.206   | 0.016 | 12.630 | <b>&lt;0.001</b> | [0.174; 0.238]  |
| Age                                        | 0.001   | 0.004 | 0.190  | 0.849            | [−0.006; 0.008] |
| Geographical Region 1                      | 0.022   | 0.161 | 0.136  | 0.892            | [−0.294; 0.338] |
| Geographical Region 2                      | 0.081   | 0.173 | 0.468  | 0.640            | [−0.259; 0.421] |
| Geographical Region 3                      | 0.382   | 0.186 | 2.059  | <b>0.04</b>      | [0.018; 0.746]  |

**Table S7.** Parameter of the GLMM for the dependent variable emotional arousal–excitement in the comparison between images of cultivated flowers and drawings representing flowers.

|                                            | $\beta$ | SE    | t      | <i>p</i>         | 95% CI           |
|--------------------------------------------|---------|-------|--------|------------------|------------------|
| Cultivated flowers and drawings of flowers | 0.229   | 0.067 | 3.409  | <b>0.001</b>     | [0.097; 0.361]   |
| Gender                                     | −0.108  | 0.145 | −0.748 | 0.454            | [−0.393; 0.176]  |
| Familiarity                                | −0.150  | 0.017 | −8.951 | <b>&lt;0.001</b> | [−0.182; −0.117] |
| Age                                        | 0.000   | 0.004 | 0.117  | 0.907            | [−0.007; 0.008]  |
| Geographical Region 1                      | 0.241   | 0.164 | 1.470  | 0.142            | [−0.081; 0.563]  |
| Geographical Region 2                      | 0.251   | 0.176 | 1.421  | 0.156            | [−0.095; 0.596]  |
| Geographical Region 3                      | 0.254   | 0.189 | 1.347  | 0.178            | [−0.116; 0.624]  |

**Table S8.** Parameter of the GLMM for the dependent variable emotional arousal–awake in the comparison between images of cultivated flowers and drawings representing flowers.

|                                            | $\beta$ | SE    | t      | <i>p</i>         | 95% CI          |
|--------------------------------------------|---------|-------|--------|------------------|-----------------|
| Cultivated flowers and drawings of flowers | 0.695   | 0.054 | 12.799 | <b>&lt;0.001</b> | [0.588; 0.801]  |
| Gender                                     | −0.052  | 0.121 | −0.433 | 0.665            | [−0.290; 0.185] |
| Familiarity                                | 0.048   | 0.014 | 3.574  | <b>&lt;0.001</b> | [0.022; 0.075]  |
| Age                                        | 0.012   | 0.003 | 3.812  | <b>&lt;0.001</b> | [0.006; 0.017]  |
| Geographical Region 1                      | 0.101   | 0.137 | 0.737  | 0.461            | [−0.168; 0.369] |
| Geographical Region 2                      | −0.245  | 0.147 | −1.666 | 0.096            | [−0.534; 0.044] |
| Geographical Region 3                      | 0.181   | 0.157 | 1.147  | 0.252            | [−0.128; 0.489] |
